# Supplementary material
Source: Springer Nature journal article supplement (https://www.springermedizin.de/resource/supplementary/12879_2008_884_MOESM1_ESM.pdf/9449562)

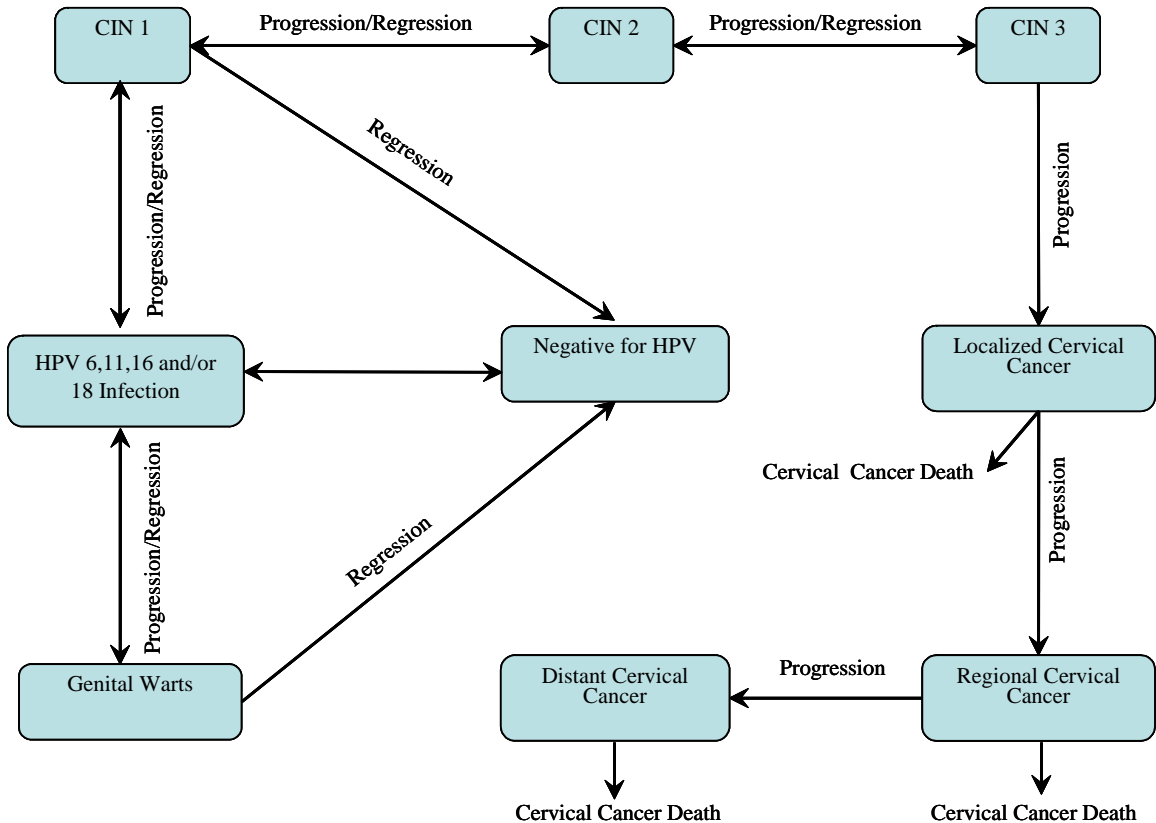

Supplement: MOESM1 [file 9449562]
